# Supplementary material for: RETRACTED: Lysosomes in Stem Cell Quiescence: A Potential Therapeutic Target in Acute Myeloid Leukemia
Source: MDPI journal article supplement (doi:10.3390/cancers14071618), 2022-03-23
Supplement: s1 [file s1]

# **Lysosomes in Hematopoietic Stem Cell Maintenance and as a Therapeutic Target in Blood Cancer**

**Vaibhav Jain<sup>1,5</sup>, Swaroop Bose <sup>2</sup>, Awadhesh K. Arya<sup>3</sup> and Tasleem Arif <sup>4,5, #</sup>**

<sup>1</sup>Abramson Cancer Center and Department of Medicine, 421 Curie Blvd., Philadelphia, Pennsylvania-19104.

<sup>2</sup>Department of Dermatology, Mount Sinai Icahn School of Medicine, New York, NY-10029.

<sup>3</sup>Departments of Anesthesiology, Shock, Trauma and Anesthesiology Research Center, University of Maryland School of Medicine, Baltimore, MD-21201

<sup>4</sup>Department of Cell, Developmental, and Regenerative Biology, Mount Sinai Icahn School of Medicine, New York, NY-10029.

**Table S1. Examples of drugs that destabilize lysosomes in cancer and in other diseases.**

| S.no | Compound                                                     | Type                    | Disease                                                                         | Action/Comments                                                                | Refs |
|------|--------------------------------------------------------------|-------------------------|---------------------------------------------------------------------------------|--------------------------------------------------------------------------------|------|
| 1    | Verapamil                                                    | Calcium channel blocker | Rhabdomyosarcoma, Lung cancer, Pancreatic cancer & Hepatocellular carcinoma     | Ca <sup>2+</sup> channel blocker                                               | [1]  |
| 2    | Mefloquine                                                   | Antimalarial drug       | AML, CLL, Hepatocellular carcinoma, Prostate cancer & Breast cancer             | Induces LMP & inhibits autophagy                                               | [1]  |
| 3    | Chloroquine                                                  | Lysosomotropic agent    | Glioblastoma, Breast cancer, Bladder cancer, Lung cancer, Sarcomas & Carcinomas | Enhances lysosomal pH, and suppress lysosome-autophagosome fusion              | [1]  |
| 4    | Hydroxychloroquine                                           | Lysosomotropic agent    | Sarcomas & Carcinomas                                                           | Inhibits autophagy by impairing lysosomal fusion with the autophagosome        | [2]  |
| 5    | L-leucyl-L-leucine methyl ester (LLeMe)                      | Lysosomotropic agent    | Carcinoma, Sarcoma, Melanoma, Lymphoma, and Leukemia                            | Enhances lysosomal endocytosis                                                 | [3]  |
| 6    | Cationic amphiphilic drugs (CADs)                            |                         | Lung cancer, Breast cancer & Prostate cancer                                    | Destabilize lysosomal membrane by inhibiting the function of lysosomal lipases | [1]  |
| 7    | Hsp70 inhibitors                                             | Inhibitor               | Carcinoma, Sarcoma, Melanoma, Lymphoma, and Leukemia                            | Inhibits lysosomal membrane permeabilization                                   | [1]  |
| 8    | DP44mT (di-2-pyridylketone 4,4-dimethyl-3-thiosemicarbazone) | Iron chelator           | Cervical cancer, Breast cancer, Colorectal cancer, Osteosarcoma, Melanoma & AML | Inhibits autophagy                                                             | [1]  |
| 9    | Bufexamac                                                    | HDAC10 inhibitor        | Neuroblastoma                                                                   | Inhibits lysosomal enzymes                                                     | [1]  |
| 10   | VER-155008                                                   | HSP70 inhibitor         | Colon cancer                                                                    | Enhances lysosomal membrane permeabilization                                   | [2]  |

|    |                            |                         |                                                           |                                                                                     |         |
|----|----------------------------|-------------------------|-----------------------------------------------------------|-------------------------------------------------------------------------------------|---------|
| 11 | TAS-116                    | HSP90 inhibitor         | Adult T-cell leukemia/lymphoma                            | Enhances cathepsin B secretion from damaged lysosomes                               | [4]     |
| 12 | NVP-AUY922                 | HSP90 inhibitor         | Adult T-cell leukemia/lymphoma & CLL                      | Enhances cathepsin B secretion from damaged lysosomes                               | [5]     |
| 13 | Obatoclox mesylate         | Bcl-2 Inhibitor         | Thyroid cancer                                            | Inhibits lysosomal fusion with autophagic vacuoles                                  | [6-8]   |
| 14 | Mixed-charge nanoparticles | pH dependent aggregator | Breast cancer, Lung cancer & Melanoma                     | Crystallize within cancer lysosomes, induces lysosomal dysfunction and cell death   | [2]     |
| 15 | Omeprazole                 | V-ATPase inhibitor      | AML                                                       | Inhibits lysosomal acidification and lysosomal fusion                               | [1]     |
| 16 | Bafilomycin A1             | V-ATPase inhibitor      | B-cell acute leukemia                                     | Inhibits lysosomal acidification and lysosomal fusion                               | [1]     |
| 17 | Saliphenylhalamide         | V-ATPase inhibitor      | Breast cancer and Lung cancer                             | Impaired acidification of lysosomes                                                 | [2]     |
| 18 | Concomycin A               | V-ATPase inhibitor      | Prostate cancer, Breast cancer & Hepatocellular carcinoma | Inhibits vacuolar pH neutralization, vacuolar trafficking, and vacuolar degradation | [9]     |
| 19 | BRD1240                    | V-ATPase Inhibitor      | Carcinoma, Sarcoma, Melanoma, Lymphoma, and Leukemia      | Inhibits secretion of lysosomal enzymes                                             | [10]    |
| 20 | SB 242784                  | V-ATPases inhibitor     | Carcinoma, Sarcoma, Melanoma, Lymphoma, and Leukemia      | Inhibits secretion of lysosomal enzymes                                             | [11-13] |
| 21 | Aliphenylhalamide          | V-ATPases Inhibitor     | Carcinoma, Sarcoma, Melanoma, Lymphoma, and Leukemia      | Inhibits secretion of lysosomal enzymes                                             | [11-13] |
| 22 | FR167356                   | V-ATPases inhibitor     | Carcinoma, Sarcoma, Melanoma, Lymphoma, and Leukemia      | Enhances lysosomal acidification                                                    | [12]    |

|    |                    |                                     |                                                      |                                                                                                                                            |         |
|----|--------------------|-------------------------------------|------------------------------------------------------|--------------------------------------------------------------------------------------------------------------------------------------------|---------|
| 23 | Salicylhalamide A  | V-ATPases inhibitor                 | Carcinoma, Sarcoma, Melanoma, Lymphoma, and Leukemia | Enhances lysosomal acidification                                                                                                           | [11]    |
| 24 | Apilimod           | PIKfyve inhibitor                   | B-cell malignancies & Melanoma                       | Disruption of lysosomal homeostasis by enlargement of lysosomes, impairment of trafficking, and prevention of autophagic cargo degradation | [14]    |
| 25 | YM-201636          | PIKfyve kinase inhibitor            | B-cell malignancies                                  | Dysregulated autophagy-induced cell death in neuronal cells                                                                                | [15]    |
| 26 | P140 peptide       | CMA inhibitor                       | Lupus                                                | Downregulated lysosomal degradation                                                                                                        | [16]    |
| 27 | Humanin            | CMA inhibitor                       | Carcinoma, Sarcoma, Melanoma, Lymphoma, and Leukemia | Endogenous activator of chaperone-mediated autophagy                                                                                       | [17,18] |
| 28 | ML-SA1             | TRPML1 agonist                      | Carcinoma, Sarcoma, Melanoma, Lymphoma, and Leukemia | Enhances lysosomal exocytosis, induces secretion of lysosomal acid phosphatases, and increase LAMP1 expression                             | [19]    |
| 29 | SF-22              | TRPML1 agonist                      | Carcinoma, Sarcoma, Melanoma, Lymphoma, and Leukemia | Enhances lysosomal exocytosis by increasing lysosomal Ca <sup>2+</sup> levels                                                              | [20]    |
| 30 | MK6-83             | TRPML1 agonist                      | Carcinoma, Sarcoma, Melanoma, Lymphoma, and Leukemia | Enhances lysosomal exocytosis by increasing lysosomal Ca <sup>2+</sup> levels                                                              | [20]    |
| 31 | Pepstatin A        | Cathepsin D inhibitor               | Carcinoma, Sarcoma, Melanoma, Lymphoma, and Leukemia | Suppress acidity of the lysosomes and therefore the enzymatic activities                                                                   | [21]    |
| 40 | NH <sub>4</sub> Cl | Phagosome-lysosome fusion inhibitor |                                                      | Inhibits lysosomal acidification                                                                                                           | [22]    |

|    |                         |                                                |                                 |                                                                                                            |         |
|----|-------------------------|------------------------------------------------|---------------------------------|------------------------------------------------------------------------------------------------------------|---------|
| 41 | Monensin                | Lysosomotropic Agent                           |                                 | Inhibits lysosomal acidification                                                                           | [23]    |
| 42 | Miglustat               | Glucosylceramide synthase Inhibitor            | Gaucher disease                 | Used in various lysosomal storage disorder                                                                 | [24]    |
| 43 | Eliglustat              | Glucosylceramide synthase Inhibitor            | Gaucher disease                 | Used in various lysosomal storage disorder                                                                 | [25]    |
| 44 | Lucerastat              | Glucosylceramide synthase Inhibitor            | Fabry disease                   | Reduced LysoTracker Red staining of acidic compartment                                                     | [26,27] |
| 45 | Ibiglustat              | Glucosylceramide synthase Inhibitor            | Gaucher disease                 | Inhibits accumulation of a globotriaosylceramide which enhances breakdown of fatty acids in the lysosomes. | [28]    |
| 46 | Genistein               | Kinase inhibitor                               | Lysosomal storage diseases      | Modulates lysosomal metabolism and Transcription Factor EB (TFEB) activation                               | [29,30] |
| 47 | Diparcil (IVA336)       | Glycosaminoglycans Inhibitor                   | Mucopolysaccharidosis (MPS)     | Decrease the lysosomal accumulation of chondroitin sulfate (CS) and dermatan sulfate (DS) in patients      | [31,32] |
| 48 | Migalastat              | Assists $\alpha$ -galactosidase A conformation | Fabry disease                   | Oral chaperone therapy for Fabry disease by increasing catalytic enzyme activity                           | [33]    |
| 49 | Afegostat (isofagomine) | $\beta$ -glucosidase Inhibitor                 |                                 | Enhances pH-dependent lysosomal activity                                                                   | [34]    |
| 50 | Pyrimethamine           | $\beta$ -glucosidase Inhibitor                 | Sandhoff and Tay–Sachs diseases | Induces lysosomal modification and release of cathepsin B                                                  | [35]    |
| 52 | Ambroxol                | $\beta$ -glucosidase Inhibitor                 | Gaucher disease                 | Modulate mitochondria, lysosomal biogenesis                                                                | [35]    |

|    |                                                                                              |                                      |                                                                                  |                                                                                                         |         |
|----|----------------------------------------------------------------------------------------------|--------------------------------------|----------------------------------------------------------------------------------|---------------------------------------------------------------------------------------------------------|---------|
| 53 | <i>N</i> -Octyl- $\beta$ -valienamine                                                        | $\beta$ -Gucocerebrosidase Inhibitor | Gaucher disease                                                                  | Epimer of <i>N</i> -octyl-4-epi- $\beta$ -valienamine for Gaucher disease                               | [36]    |
| 54 | <i>N</i> -Acetylcysteine                                                                     | $\beta$ -glucosidase Inhibitor       | Pompe disease                                                                    | Allosteric chaperone active in Pompe disease                                                            | [37]    |
| 55 | 5-(4-(4-Acetylphenyl)piperazin-1-ylsulfonyl)-6-chloroindolin-2-one                           | $\beta$ -glucosidase Inhibitor       | Pompe disease                                                                    | High chaperone activity against acid $\alpha$ -glucosidase                                              | [38]    |
| 56 | Chaperone 1-Deoxynojirimycin                                                                 | $\beta$ -glucosidase Inhibitor       | Pompe disease                                                                    | Enhances lysosomal trafficking                                                                          | [39]    |
| 57 | $\alpha$ -Lobeline and 3,4,7-trihydroxyisoflavone                                            | $\beta$ -Gucocerebrosidase Inhibitor | Krabbe disease                                                                   | Effective in fibroblast cells from patients with Krabbe disease                                         | [40]    |
| 58 | <i>N</i> -Octyl-4-epi- $\beta$ -valienamine                                                  | $\beta$ -glucosidase Inhibitor       | Lysosomal storage disorders                                                      | Enhanced $\beta$ -galactosidase activity, reduced substrate storage                                     | [36]    |
| 59 | 5 <i>N</i> ,6 <i>S</i> -( <i>N'</i> -butyliminomethylidene)-6-thio-1-deoxygalactonojirimycin | $\beta$ -glucosidase Inhibitor       | Neuronopathic GM1 gangliosidosis and non-neuronopathic Morquio B disease         | Enhanced $\beta$ -galactosidase activity, reduced substrate storage                                     | [41]    |
| 60 | NCGC607                                                                                      | $\beta$ -Gucocerebrosidase Inhibitor | Gaucher Disease and Parkinsonism                                                 | Reduces lysosomal substrate storage and $\alpha$ -synuclein levels                                      | [42]    |
| 61 | Rapamycin/sirolimus                                                                          | mTOR Inhibitor                       | Systemic lupus erythematosus, Rheumatoid arthritis and Various cancer Cell types | Used in the treatment of many diseases, including Systemic lupus erythematosus and Rheumatoid arthritis | [43,44] |
| 62 | CA030, CA-074 and their analogues                                                            | Cathepsin B inhibitor                | Osteoarthritis and Melanoma metastases                                           | Increased levels of cathepsin B. Promising therapeutic                                                  | [45,46] |

|    |                                 |                             |                                                    |                                                                                         |         |
|----|---------------------------------|-----------------------------|----------------------------------------------------|-----------------------------------------------------------------------------------------|---------|
|    |                                 |                             |                                                    | target for melanoma metastases                                                          |         |
| 63 | Pepstatin A                     | Cathepsin D inhibitor       | Renal fibrosis                                     | Reduction of renal fibrosis in mouse models of CKD256                                   | [47]    |
| 64 | CLIK-148, CLIK-181 and CLIK-195 | Cathepsin L inhibitor       | Autoimmune diabetes                                | Inhibits cathepsin L levels                                                             | [48-50] |
| 65 | LHVS and CLIK-60                | Cathepsin S inhibitor       | Systemic lupus erythematosus                       | Inhibits cathepsin S levels                                                             | [51-53] |
| 66 | RO5461111/Roche                 | Cathepsin S inhibitor       | Sjogrens syndrome and Systemic lupus erythematosus | Inhibits cathepsin S via inhibiting autoantigen presentation                            | [51,54] |
| 67 | CLIK-164 and SB-357114          | Cathepsin K inhibitor       | Osteoarthritis                                     | Inhibits cathepsin K levels reduces collagen degradation                                | [55,56] |
| 68 | L-006235                        | Cathepsin K inhibitor       | Osteoarthritis                                     | Inhibits cathepsin K levels                                                             | [51]    |
| 69 | PADK, SD1002 and SD1003         | Cathepsin B and L inhibitor | Alzheimer disease                                  | Inhibits levels of Cathepsin B and L                                                    | [57]    |
| 70 | Lonafarnib                      | Lysosomal activator         | Neurodegenerative disease                          | Inhibits farnesyl transferase and reduces tauopathy by activating lysosomal degradation | [58]    |

## References

1. Bonam, S.R.; Wang, F.; Muller, S. Lysosomes as a therapeutic target. *Nat Rev Drug Discov* **2019**, *18*, 923-948, doi:10.1038/s41573-019-0036-1.
2. Rafiq, S.; McKenna, S.L.; Muller, S.; Tschan, M.P.; Humbert, M. Lysosomes in acute myeloid leukemia: potential therapeutic targets? *Leukemia* **2021**, *35*, 2759-2770, doi:10.1038/s41375-021-01388-x.
3. Kavcic, N.; Butinar, M.; Sobotic, B.; Hafner Cesen, M.; Petelin, A.; Bojic, L.; Zavasnik Bergant, T.; Bratovs, A.; Reinheckel, T.; Turk, B. Intracellular cathepsin C levels determine sensitivity of cells to leucyl-leucine methyl ester-triggered apoptosis. *FEBS J* **2020**, *287*, 5148-5166, doi:10.1111/febs.15326.
4. Ikebe, E.; Shimosaki, S.; Hasegawa, H.; Iha, H.; Tsukamoto, Y.; Wang, Y.; Sasaki, D.; Imaizumi, Y.; Miyazaki, Y.; Yanagihara, K.; et al. TAS-116 (pimipib), a heat shock protein 90 inhibitor, shows efficacy in preclinical models of adult T-cell leukemia. *Cancer Sci* **2021**, doi:10.1111/cas.15204.
5. Walsby, E.; Pearce, L.; Burnett, A.K.; Fegan, C.; Pepper, C. The Hsp90 inhibitor NVP-AUY922-AG inhibits NF-kappaB signaling, overcomes microenvironmental cytoprotection and is highly synergistic with fludarabine in primary CLL cells. *Oncotarget* **2012**, *3*, 525-534, doi:10.18632/oncotarget.491.
6. Nguyen, M.; Marcellus, R.C.; Roulston, A.; Watson, M.; Serfass, L.; Murthy Madiraju, S.R.; Goulet, D.; Viallet, J.; Belec, L.; Billot, X.; et al. Small molecule obatoclax (GX15-070) antagonizes MCL-1 and overcomes MCL-1-mediated resistance to apoptosis. *Proc Natl Acad Sci U S A* **2007**, *104*, 19512-19517, doi:10.1073/pnas.0709443104.
7. Oki, Y.; Copeland, A.; Hagemeister, F.; Fayad, L.E.; Fanale, M.; Romaguera, J.; Younes, A. Experience with obatoclax mesylate (GX15-070), a small molecule pan-Bcl-2 family antagonist in patients with relapsed or refractory classical Hodgkin lymphoma. *Blood* **2012**, *119*, 2171-2172, doi:10.1182/blood-2011-11-391037.
8. Parikh, S.A.; Kantarjian, H.; Schimmer, A.; Walsh, W.; Asatiani, E.; El-Shami, K.; Winton, E.; Verstovsek, S. Phase II study of obatoclax mesylate (GX15-070), a small-molecule BCL-2 family antagonist, for patients with myelofibrosis. *Clin Lymphoma Myeloma Leuk* **2010**, *10*, 285-289, doi:10.3816/CLML.2010.n.059.
9. Koltai, T. Targeting the pH Paradigm at the Bedside: A Practical Approach. *Int J Mol Sci* **2020**, *21*, doi:10.3390/ijms21239221.
10. Aldrich, L.N.; Kuo, S.Y.; Castoreno, A.B.; Goel, G.; Kuballa, P.; Rees, M.G.; Seashore-Ludlow, B.A.; Cheah, J.H.; Latorre, I.J.; Schreiber, S.L.; et al. Discovery of a Small-Molecule Probe for V-ATPase Function. *J Am Chem Soc* **2015**, *137*, 5563-5568, doi:10.1021/jacs.5b02150.



11. Lebreton, S.; Jaunbergs, J.; Roth, M.G.; Ferguson, D.A.; De Brabander, J.K. Evaluating the potential of vacuolar ATPase inhibitors as anticancer agents and multigram synthesis of the potent salicylhalamide analog saliphenylhalamide. *Bioorg Med Chem Lett* **2008**, *18*, 5879-5883, doi:10.1016/j.bmcl.2008.07.003.
12. Niikura, K.; Takano, M.; Sawada, M. A novel inhibitor of vacuolar ATPase, FR167356, which can discriminate between osteoclast vacuolar ATPase and lysosomal vacuolar ATPase. *Br J Pharmacol* **2004**, *142*, 558-566, doi:10.1038/sj.bjp.0705812.
13. Niikura, K.; Takeshita, N.; Takano, M. A vacuolar ATPase inhibitor, FR167356, prevents bone resorption in ovariectomized rats with high potency and specificity: potential for clinical application. *J Bone Miner Res* **2005**, *20*, 1579-1588, doi:10.1359/JBMR.050517.
14. Gayle, S.; Landrette, S.; Beeharry, N.; Conrad, C.; Hernandez, M.; Beckett, P.; Ferguson, S.M.; Mandelkern, T.; Zheng, M.; Xu, T.; et al. Identification of apilimod as a first-in-class PIKfyve kinase inhibitor for treatment of B-cell non-Hodgkin lymphoma. *Blood* **2017**, *129*, 1768-1778, doi:10.1182/blood-2016-09-736892.
15. Martin, S.; Harper, C.B.; May, L.M.; Coulson, E.J.; Meunier, F.A.; Osborne, S.L. Inhibition of PIKfyve by YM-201636 dysregulates autophagy and leads to apoptosis-independent neuronal cell death. *PLoS One* **2013**, *8*, e60152, doi:10.1371/journal.pone.0060152.
16. Zimmer, R.; Scherbarth, H.R.; Rillo, O.L.; Gomez-Reino, J.J.; Muller, S. Lupuzor/P140 peptide in patients with systemic lupus erythematosus: a randomised, double-blind, placebo-controlled phase IIb clinical trial. *Ann Rheum Dis* **2013**, *72*, 1830-1835, doi:10.1136/annrheumdis-2012-202460.
17. Gong, Z.; Tasset, I. Humanin enhances the cellular response to stress by activation of chaperone-mediated autophagy. *Oncotarget* **2018**, *9*, 10832-10833, doi:10.18632/oncotarget.24396.
18. Gong, Z.; Tasset, I.; Diaz, A.; Anguiano, J.; Tas, E.; Cui, L.; Kuliawat, R.; Liu, H.; Kuhn, B.; Cuervo, A.M.; et al. Humanin is an endogenous activator of chaperone-mediated autophagy. *J Cell Biol* **2018**, *217*, 635-647, doi:10.1083/jcb.201606095.
19. Samie, M.; Wang, X.; Zhang, X.; Goschka, A.; Li, X.; Cheng, X.; Gregg, E.; Azar, M.; Zhuo, Y.; Garrity, A.G.; et al. A TRP channel in the lysosome regulates large particle phagocytosis via focal exocytosis. *Dev Cell* **2013**, *26*, 511-524, doi:10.1016/j.devcel.2013.08.003.

20. Tancini, B.; Buratta, S.; Delo, F.; Sagini, K.; Chiaradia, E.; Pellegrino, R.M.; Emiliani, C.; Urbanelli, L. Lysosomal Exocytosis: The Extracellular Role of an Intracellular Organelle. *Membranes (Basel)* **2020**, *10*, doi:10.3390/membranes10120406.
21. Li, M.; Khambu, B.; Zhang, H.; Kang, J.H.; Chen, X.; Chen, D.; Vollmer, L.; Liu, P.Q.; Vogt, A.; Yin, X.M. Suppression of lysosome function induces autophagy via a feedback down-regulation of MTOR complex 1 (MTORC1) activity. *J Biol Chem* **2013**, *288*, 35769-35780, doi:10.1074/jbc.M113.511212.
22. Hart, P.D.; Young, M.R. Ammonium chloride, an inhibitor of phagosome-lysosome fusion in macrophages, concurrently induces phagosome-endosome fusion, and opens a novel pathway: studies of a pathogenic mycobacterium and a nonpathogenic yeast. *J Exp Med* **1991**, *174*, 881-889, doi:10.1084/jem.174.4.881.
23. Stenseth, K.; Thyberg, J. Monensin and chloroquine inhibit transfer to lysosomes of endocytosed macromolecules in cultured mouse peritoneal macrophages. *Eur J Cell Biol* **1989**, *49*, 326-333.
24. Kuter, D.J.; Mehta, A.; Hollak, C.E.; Giraldo, P.; Hughes, D.; Belmatoug, N.; Brand, M.; Muller, A.; Schaaf, B.; Giorgino, R.; et al. Miglustat therapy in type 1 Gaucher disease: clinical and safety outcomes in a multicenter retrospective cohort study. *Blood Cells Mol Dis* **2013**, *51*, 116-124, doi:10.1016/j.bcmd.2013.04.005.
25. Smid, B.E.; Ferraz, M.J.; Verhoek, M.; Mirzaian, M.; Wisse, P.; Overkleeft, H.S.; Hollak, C.E.; Aerts, J.M. Biochemical response to substrate reduction therapy versus enzyme replacement therapy in Gaucher disease type 1 patients. *Orphanet J Rare Dis* **2016**, *11*, 28, doi:10.1186/s13023-016-0413-3.
26. Guerard, N.; Morand, O.; Dingemanse, J. Lucerastat, an iminosugar with potential as substrate reduction therapy for glycolipid storage disorders: safety, tolerability, and pharmacokinetics in healthy subjects. *Orphanet J Rare Dis* **2017**, *12*, 9, doi:10.1186/s13023-017-0565-9.
27. Guerard, N.; Oder, D.; Nordbeck, P.; Zwingelstein, C.; Morand, O.; Welford, R.W.D.; Dingemanse, J.; Wanner, C. Lucerastat, an Iminosugar for Substrate Reduction Therapy: Tolerability, Pharmacodynamics, and Pharmacokinetics in Patients With Fabry Disease on Enzyme Replacement. *Clin Pharmacol Ther* **2018**, *103*, 703-711, doi:10.1002/cpt.790.
28. Marshall, J.; Sun, Y.; Bangari, D.S.; Budman, E.; Park, H.; Nietupski, J.B.; Allaire, A.; Cromwell, M.A.; Wang, B.; Grabowski, G.A.; et al. CNS-accessible Inhibitor of Glucosylceramide Synthase for Substrate Reduction Therapy of Neuronopathic Gaucher Disease. *Mol Ther* **2016**, *24*, 1019-1029, doi:10.1038/mt.2016.53.

29. Moskot, M.; Montefusco, S.; Jakobkiewicz-Banecka, J.; Mozolewski, P.; Wegrzyn, A.; Di Bernardo, D.; Wegrzyn, G.; Medina, D.L.; Ballabio, A.; Gabig-Ciminska, M. The phytoestrogen genistein modulates lysosomal metabolism and transcription factor EB (TFEB) activation. *J Biol Chem* **2014**, *289*, 17054-17069, doi:10.1074/jbc.M114.555300.
30. Piotrowska, E.; Jakobkiewicz-Banecka, J.; Tylki-Szymanska, A.; Liberek, A.; Maryniak, A.; Malinowska, M.; Czartoryska, B.; Puk, E.; Kloska, A.; Liberek, T.; et al. Genistin-rich soy isoflavone extract in substrate reduction therapy for Sanfilippo syndrome: An open-label, pilot study in 10 pediatric patients. *Curr Ther Res Clin Exp* **2008**, *69*, 166-179, doi:10.1016/j.curtheres.2008.04.002.
31. Entchev, E.; Antonelli, S.; Mauro, V.; Cimbolini, N.; Jantzen, I.; Roussey, A.; Germain, J.M.; Zhang, H.; Luccarrini, J.M.; Lacombe, O.; et al. MPS VI associated ocular phenotypes in an MPS VI murine model and the therapeutic effects of odiparcil treatment. *Mol Genet Metab* **2021**, doi:10.1016/j.ymgme.2021.07.008.
32. Entchev, E.; Jantzen, I.; Masson, P.; Bocart, S.; Bournique, B.; Luccarini, J.M.; Bouchot, A.; Lacombe, O.; Junien, J.L.; Broqua, P.; et al. Odiparcil, a potential glycosaminoglycans clearance therapy in mucopolysaccharidosis VI-Evidence from in vitro and in vivo models. *PLoS One* **2020**, *15*, e0233032, doi:10.1371/journal.pone.0233032.
33. McCafferty, E.H.; Scott, L.J. Migalastat: A Review in Fabry Disease. *Drugs* **2019**, *79*, 543-554, doi:10.1007/s40265-019-01090-4.
34. Steet, R.A.; Chung, S.; Wustman, B.; Powe, A.; Do, H.; Kornfeld, S.A. The iminosugar isofagomine increases the activity of N370S mutant acid beta-glucosidase in Gaucher fibroblasts by several mechanisms. *Proc Natl Acad Sci U S A* **2006**, *103*, 13813-13818, doi:10.1073/pnas.0605928103.
35. Magalhaes, J.; Gegg, M.E.; Migdalska-Richards, A.; Schapira, A.H. Effects of ambroxol on the autophagy-lysosome pathway and mitochondria in primary cortical neurons. *Sci Rep* **2018**, *8*, 1385, doi:10.1038/s41598-018-19479-8.
36. Matsuda, J.; Suzuki, O.; Oshima, A.; Yamamoto, Y.; Noguchi, A.; Takimoto, K.; Itoh, M.; Matsuzaki, Y.; Yasuda, Y.; Ogawa, S.; et al. Chemical chaperone therapy for brain pathology in G(M1)-gangliosidosis. *Proc Natl Acad Sci U S A* **2003**, *100*, 15912-15917, doi:10.1073/pnas.2536657100.
37. Porto, C.; Ferrara, M.C.; Meli, M.; Acampora, E.; Avolio, V.; Rosa, M.; Cobucci-Ponzano, B.; Colombo, G.; Moracci, M.; Andria, G.; et al. Pharmacological enhancement of alpha-glucosidase by the allosteric chaperone N-acetylcysteine. *Mol Ther* **2012**, *20*, 2201-2211, doi:10.1038/mt.2012.152.

38. Xiao, J.; Westbroek, W.; Motabar, O.; Lea, W.A.; Hu, X.; Velayati, A.; Zheng, W.; Southall, N.; Gustafson, A.M.; Goldin, E.; et al. Discovery of a novel noniminosugar acid alpha glucosidase chaperone series. *J Med Chem* **2012**, *55*, 7546-7559, doi:10.1021/jm3005543.
39. Parenti, G.; Andria, G.; Ballabio, A. Lysosomal storage diseases: from pathophysiology to therapy. *Annu Rev Med* **2015**, *66*, 471-486, doi:10.1146/annurev-med-122313-085916.
40. Berardi, A.S.; Pannuzzo, G.; Graziano, A.; Costantino-Ceccarini, E.; Piomboni, P.; Luddi, A. Pharmacological chaperones increase residual beta-galactocerebrosidase activity in fibroblasts from Krabbe patients. *Mol Genet Metab* **2014**, *112*, 294-301, doi:10.1016/j.ymgme.2014.05.009.
41. Takai, T.; Higaki, K.; Aguilar-Moncayo, M.; Mena-Barragan, T.; Hirano, Y.; Yura, K.; Yu, L.; Ninomiya, H.; Garcia-Moreno, M.I.; Sakakibara, Y.; et al. A bicyclic 1-deoxygalactonojirimycin derivative as a novel pharmacological chaperone for GM1 gangliosidosis. *Mol Ther* **2013**, *21*, 526-532, doi:10.1038/mt.2012.263.
42. Aflaki, E.; Borger, D.K.; Moaven, N.; Stubblefield, B.K.; Rogers, S.A.; Patnaik, S.; Schoenen, F.J.; Westbroek, W.; Zheng, W.; Sullivan, P.; et al. A New Glucocerebrosidase Chaperone Reduces alpha-Synuclein and Glycolipid Levels in iPSC-Derived Dopaminergic Neurons from Patients with Gaucher Disease and Parkinsonism. *J Neurosci* **2016**, *36*, 7441-7452, doi:10.1523/JNEUROSCI.0636-16.2016.
43. Lai, Z.W.; Kelly, R.; Winans, T.; Marchena, I.; Shadakshari, A.; Yu, J.; Dawood, M.; Garcia, R.; Tily, H.; Francis, L.; et al. Sirolimus in patients with clinically active systemic lupus erythematosus resistant to, or intolerant of, conventional medications: a single-arm, open-label, phase 1/2 trial. *Lancet* **2018**, *391*, 1186-1196, doi:10.1016/S0140-6736(18)30485-9.
44. Shao, P.; Ma, L.; Ren, Y.; Liu, H. Modulation of the immune response in rheumatoid arthritis with strategically released rapamycin. *Mol Med Rep* **2017**, *16*, 5257-5262, doi:10.3892/mmr.2017.7285.
45. Hashimoto, Y.; Kakegawa, H.; Narita, Y.; Hachiya, Y.; Hayakawa, T.; Kos, J.; Turk, V.; Katunuma, N. Significance of cathepsin B accumulation in synovial fluid of rheumatoid arthritis. *Biochem Biophys Res Commun* **2001**, *283*, 334-339, doi:10.1006/bbrc.2001.4787.
46. Matarrese, P.; Ascione, B.; Ciarlo, L.; Vona, R.; Leonetti, C.; Scarsella, M.; Mileo, A.M.; Catricala, C.; Paggi, M.G.; Malorni, W. Cathepsin B inhibition interferes with metastatic potential of human melanoma: an in vitro and in vivo study. *Mol Cancer* **2010**, *9*, 207, doi:10.1186/1476-4598-9-207.

47. Miyata, J.; Tani, K.; Sato, K.; Otsuka, S.; Urata, T.; Lkhagvaa, B.; Furukawa, C.; Sano, N.; Sone, S. Cathepsin G: the significance in rheumatoid arthritis as a monocyte chemoattractant. *Rheumatol Int* **2007**, *27*, 375-382, doi:10.1007/s00296-006-0210-8.
48. Ikeda, Y.; Ikata, T.; Mishiro, T.; Nakano, S.; Ikebe, M.; Yasuoka, S. Cathepsins B and L in synovial fluids from patients with rheumatoid arthritis and the effect of cathepsin B on the activation of pro-urokinase. *J Med Invest* **2000**, *47*, 61-75.
49. Shah, P.P.; Wang, T.; Kaletsky, R.L.; Myers, M.C.; Purvis, J.E.; Jing, H.; Hury, D.M.; Greenbaum, D.C.; Smith, A.B., 3rd; Bates, P.; et al. A small-molecule oxocarbazate inhibitor of human cathepsin L blocks severe acute respiratory syndrome and ebola pseudotype virus infection into human embryonic kidney 293T cells. *Mol Pharmacol* **2010**, *78*, 319-324, doi:10.1124/mol.110.064261.
50. Yamada, A.; Ishimaru, N.; Arakaki, R.; Katunuma, N.; Hayashi, Y. Cathepsin L inhibition prevents murine autoimmune diabetes via suppression of CD8(+) T cell activity. *PLoS One* **2010**, *5*, e12894, doi:10.1371/journal.pone.0012894.
51. Raposo, G.; Marks, M.S. Melanosomes--dark organelles enlighten endosomal membrane transport. *Nat Rev Mol Cell Biol* **2007**, *8*, 786-797, doi:10.1038/nrm2258.
52. Saegusa, K.; Ishimaru, N.; Yanagi, K.; Arakaki, R.; Ogawa, K.; Saito, I.; Katunuma, N.; Hayashi, Y. Cathepsin S inhibitor prevents autoantigen presentation and autoimmunity. *J Clin Invest* **2002**, *110*, 361-369, doi:10.1172/JCI14682.
53. Turk, V.; Stoka, V.; Vasiljeva, O.; Renko, M.; Sun, T.; Turk, B.; Turk, D. Cysteine cathepsins: from structure, function and regulation to new frontiers. *Biochim Biophys Acta* **2012**, *1824*, 68-88, doi:10.1016/j.bbapap.2011.10.002.
54. Rupanagudi, K.V.; Kulkarni, O.P.; Lichtnekert, J.; Darisipudi, M.N.; Mulay, S.R.; Schott, B.; Gruner, S.; Haap, W.; Hartmann, G.; Anders, H.J. Cathepsin S inhibition suppresses systemic lupus erythematosus and lupus nephritis because cathepsin S is essential for MHC class II-mediated CD4 T cell and B cell priming. *Ann Rheum Dis* **2015**, *74*, 452-463, doi:10.1136/annrheumdis-2013-203717.
55. Katunuma, N.; Matsui, A.; Inubushi, T.; Murata, E.; Kakegawa, H.; Ohba, Y.; Turk, D.; Turk, V.; Tada, Y.; Asao, T. Structure-based development of pyridoxal propionate derivatives as specific inhibitors of cathepsin K in vitro and in vivo. *Biochem Biophys Res Commun* **2000**, *267*, 850-854, doi:10.1006/bbrc.1999.1953.

56. Stroup, G.B.; Lark, M.W.; Veber, D.F.; Bhattacharyya, A.; Blake, S.; Dare, L.C.; Erhard, K.F.; Hoffman, S.J.; James, I.E.; Marquis, R.W.; et al. Potent and selective inhibition of human cathepsin K leads to inhibition of bone resorption in vivo in a nonhuman primate. *J Bone Miner Res* **2001**, *16*, 1739-1746, doi:10.1359/jbmr.2001.16.10.1739.
57. Viswanathan, K.; Hoover, D.J.; Hwang, J.; Wisniewski, M.L.; Ikonne, U.S.; Bahr, B.A.; Wright, D.L. Nonpeptidic lysosomal modulators derived from z-phe-ala-diazomethylketone for treating protein accumulation diseases. *ACS Med Chem Lett* **2012**, *3*, 920-924, doi:10.1021/ml300197h.
58. Pineda, M.; Walterfang, M.; Patterson, M.C. Miglustat in Niemann-Pick disease type C patients: a review. *Orphanet J Rare Dis* **2018**, *13*, 140, doi:10.1186/s13023-018-0844-0.
